# Supplementary material
Source: Royal Society of Chemistry journal article supplement (doi:10.1039/d6gc01227b)
Supplement: d6gc01227b1.pdf [file d6gc01227b1.pdf]

# Supplementary Information

## Regeneration of Spent Graphite via TEATFB-Assisted Surface Cleaning and Defect Healing

Lili Li,<sup>†a,c</sup> Taiyu Jin, <sup>†a</sup> Xiaofeng Liu, <sup>†b</sup> Yaqiong Su, <sup>b</sup> Xiaolong Lyu,<sup>a,b</sup> Yaxin Chen,

<sup>a</sup> Sen Dang, <sup>b</sup> Bo Wen, <sup>b</sup> Zhijie Zhang, <sup>a,b</sup> Boyang Shui, <sup>a</sup> Shuyang Ren, <sup>a,b</sup> Xiaole

Ma,<sup>a</sup> Shanshan Li, <sup>\*a</sup> Wei Yan<sup>\*a</sup> and Guorui Yang <sup>\*b</sup>

*a Xi'an Key Laboratory of Solid Waste Recycling and Resource Recovery, National Innovation Platform (Center) for Industry-Education Integration of Energy Storage Technology, Department of Environmental Science & Engineering, School of Energy and Power Engineering, Xi'an Jiaotong University, Xi'an, 710049, Shaanxi, P. R. China*

*b School of Chemistry, Engineering Research Center of Energy Storage Materials and Devices, Ministry of Education, "Four Joint Subjects One Union" School-Enterprise Joint Research Center for Power Battery Recycling & Circulation Utilization Technology, Xi'an Jiaotong University, Xi'an, 710049, Shaanxi, P. R. China*

*c Alpha ESS Company Limited, Nantong 226300, People's Republic of China*

**\* Corresponding authors:** Shanshan Li (Email: shanshan0320@xjtu.edu.cn); Wei Yan (Email: yanwei@xjtu.edu.cn); Guorui Yang (Email: yangguorui@xjtu.edu.cn).

<sup>†</sup> Lili Li, Taiyu Jin and Xiaofeng Liu contributed equally to this paper.

**This supporting information contains:**

- Fig. S1-S21
- Table S1-S9

Supporting Figures:

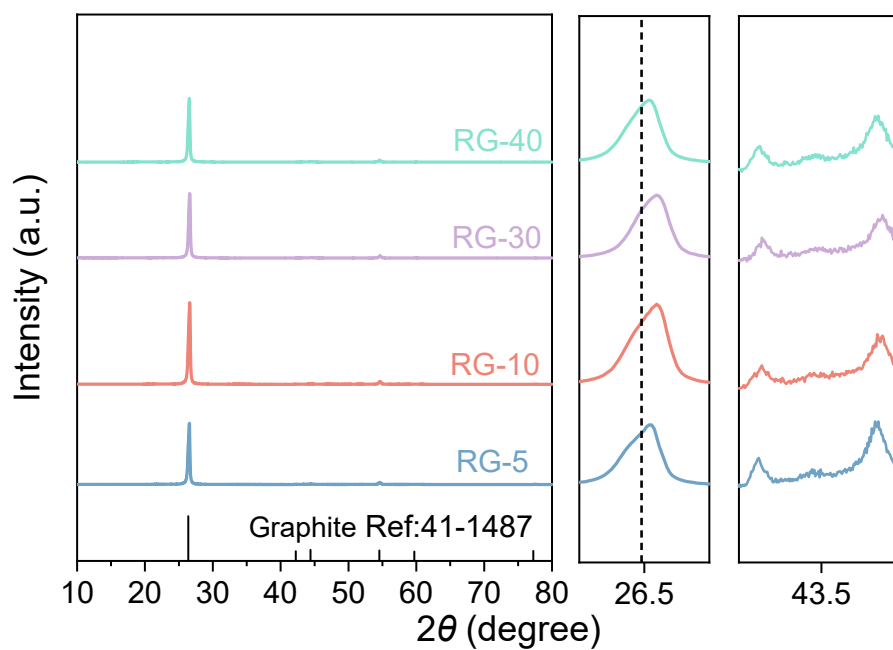

Fig. S1 XRD Patterns of Additional Samples.

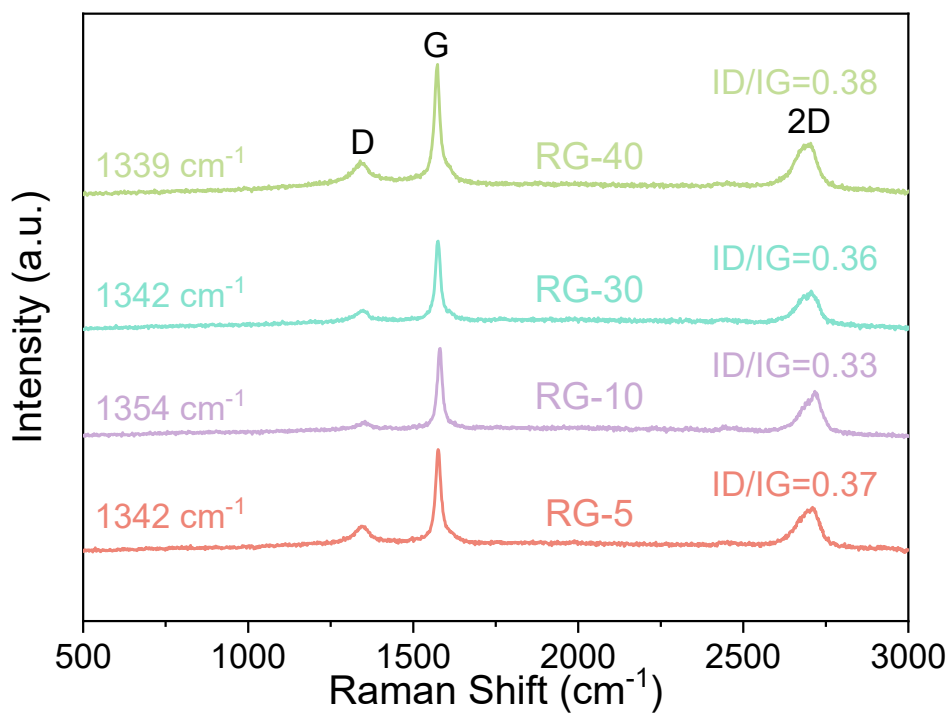

Fig. S2 Raman spectra of Additional Samples.

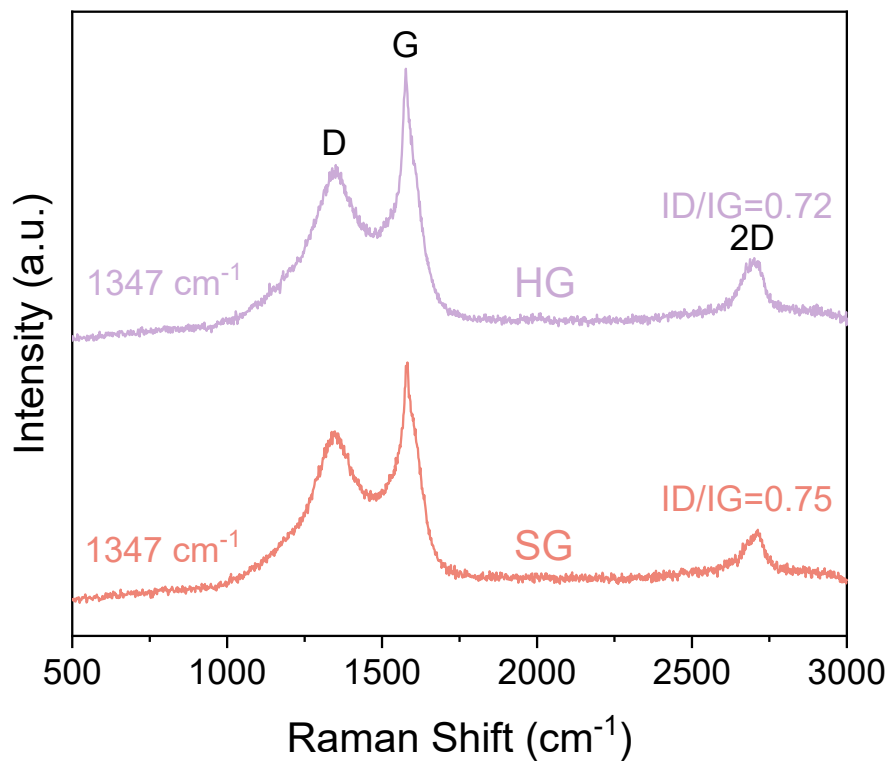

Fig. S3 Raman spectra of HG and SG.

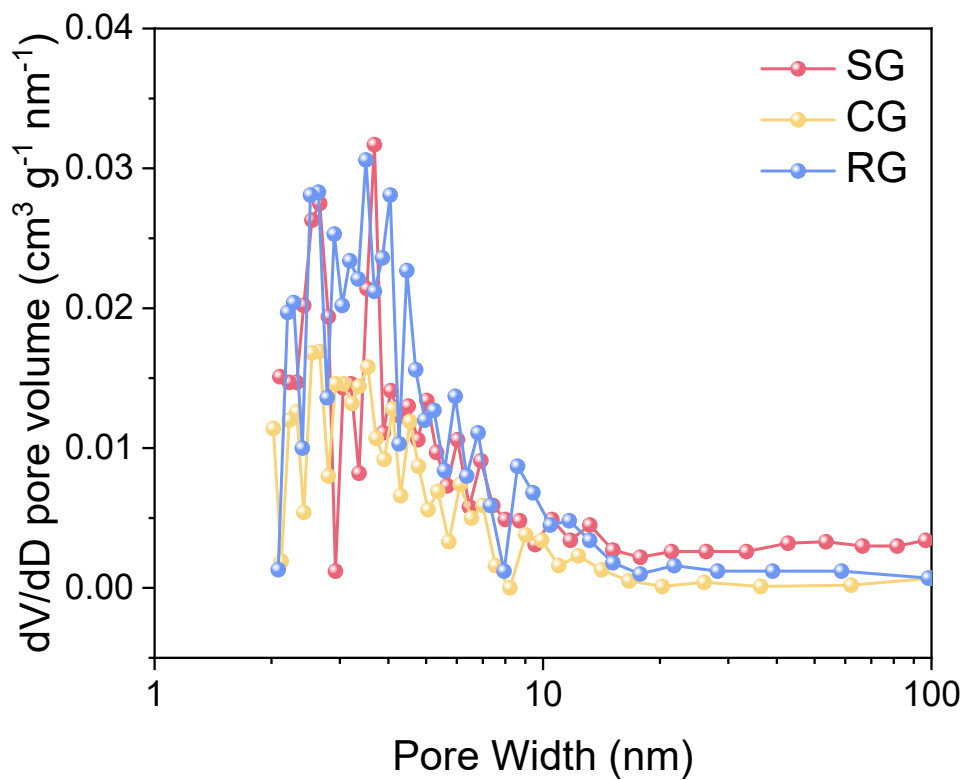

Fig. S4 Pore size distribution of SG, CG, and RG samples measured by BET.

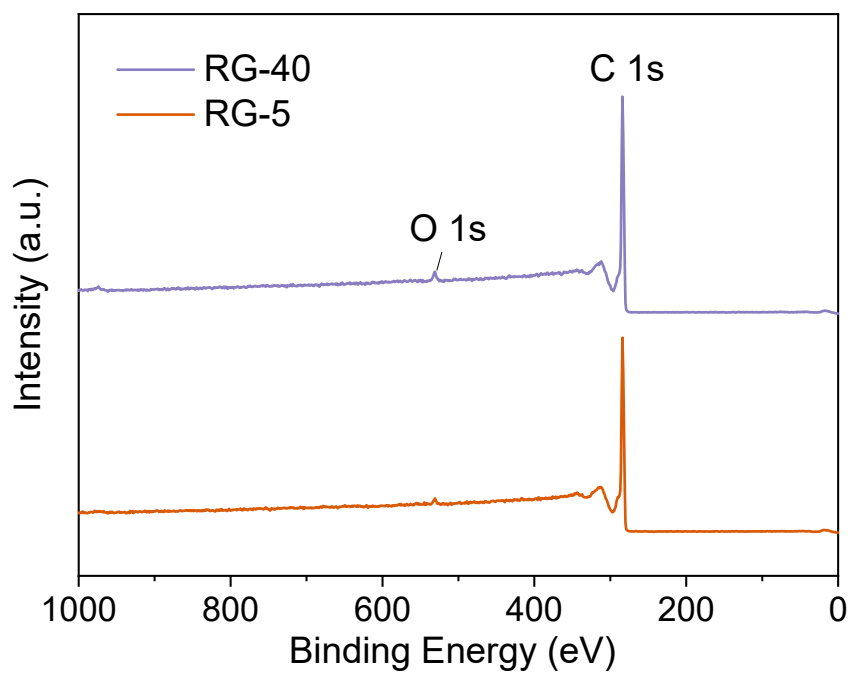

Fig. S5 XPS full survey spectra of RG-5 and RG-40 samples.

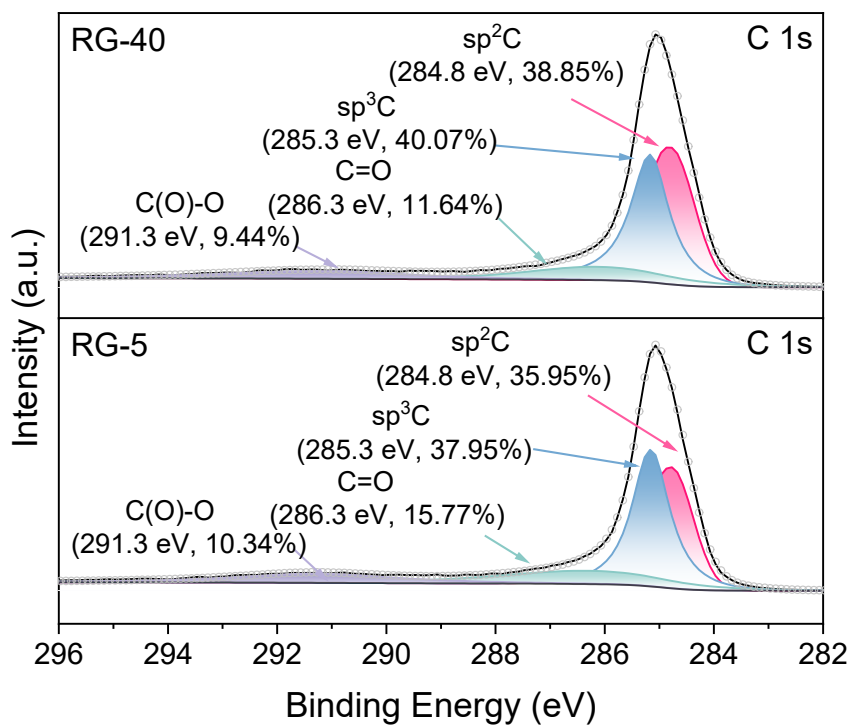

Fig. S6 High-resolution C 1s XPS spectra of RG-5 and RG-40 samples.

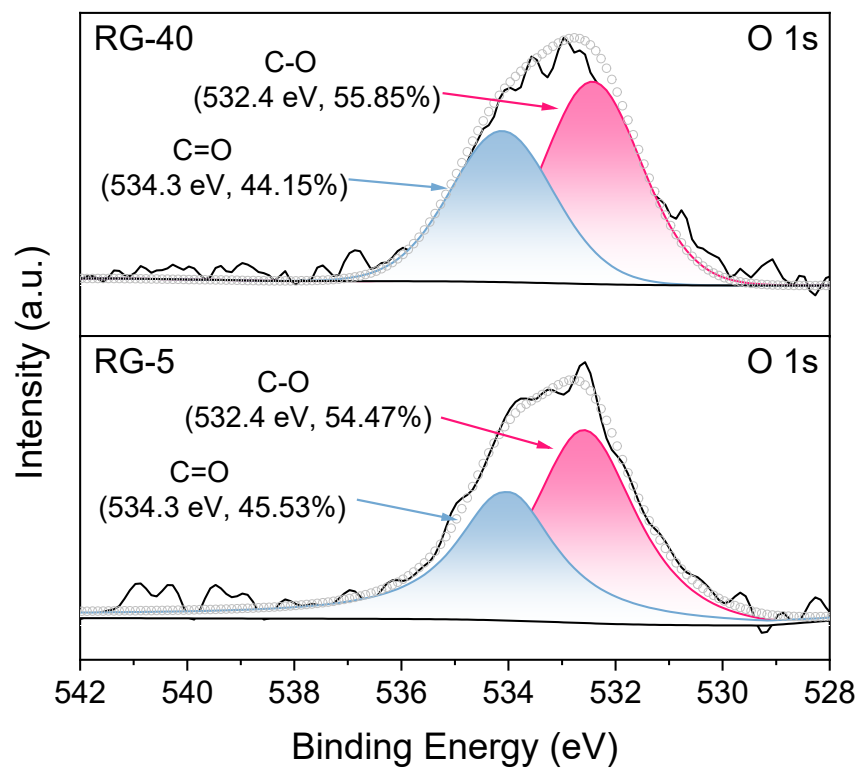

Fig. S7 High-resolution O- 1s XPS spectra of RG-5 and RG-40 samples.

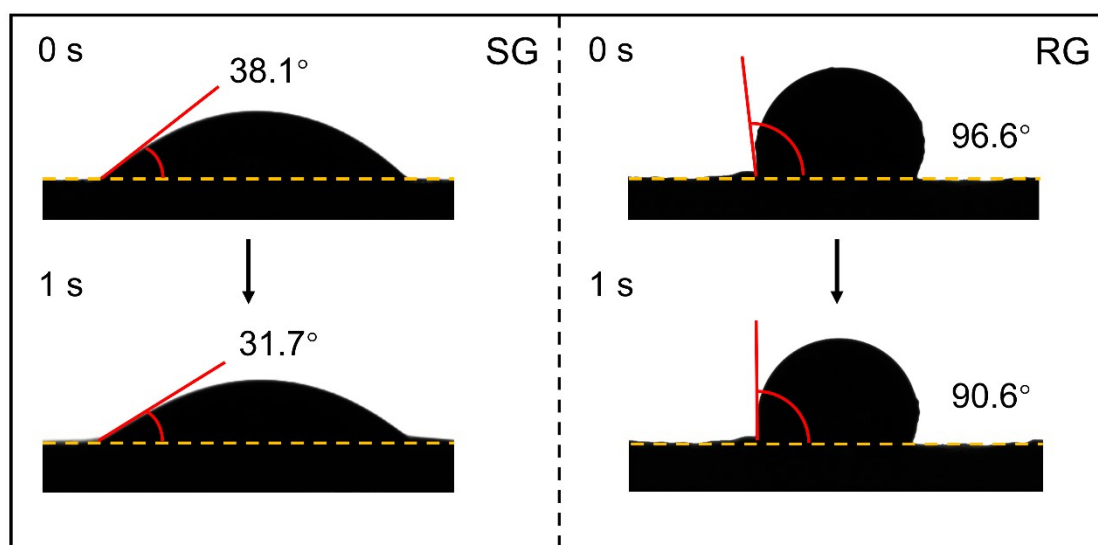

Fig. S8 Water contact angle measurements of SG and RG.

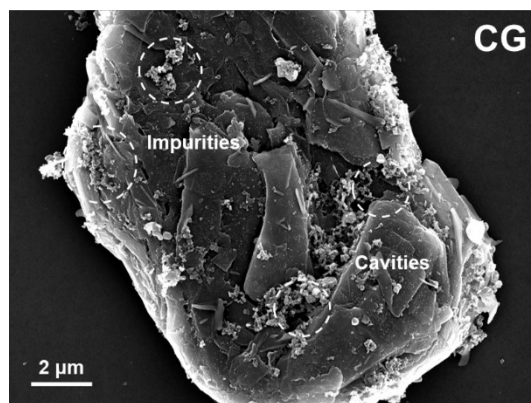

**Fig. S9** SEM images of HG.

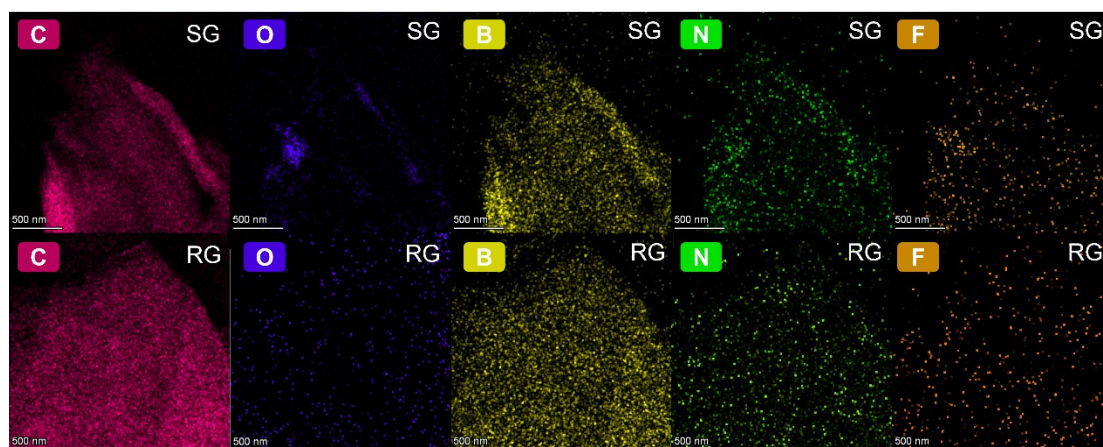

**Fig. S10** Comparison of HRTEM-EDX elemental mapping of SG and RG samples.

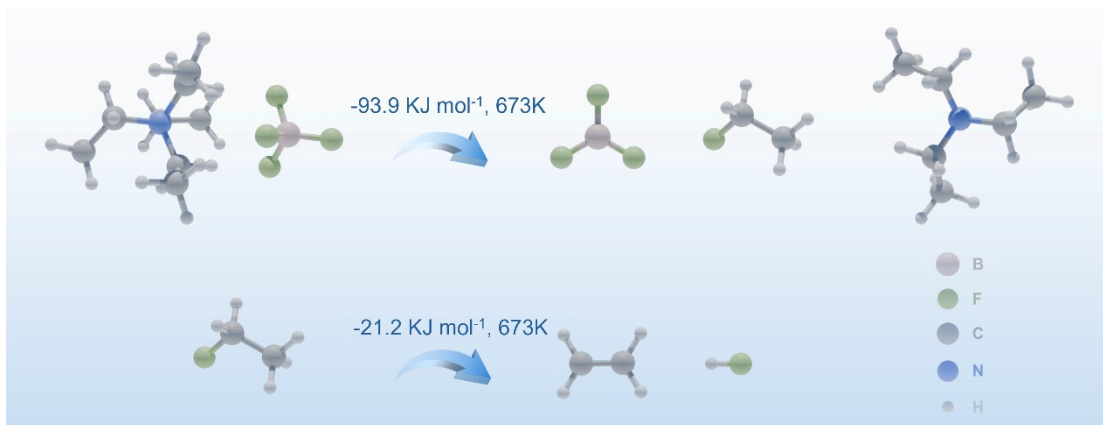

**Fig. S11** Proposed decomposition pathways of TEATFB at 673 K and their associated Gibbs free energy changes.

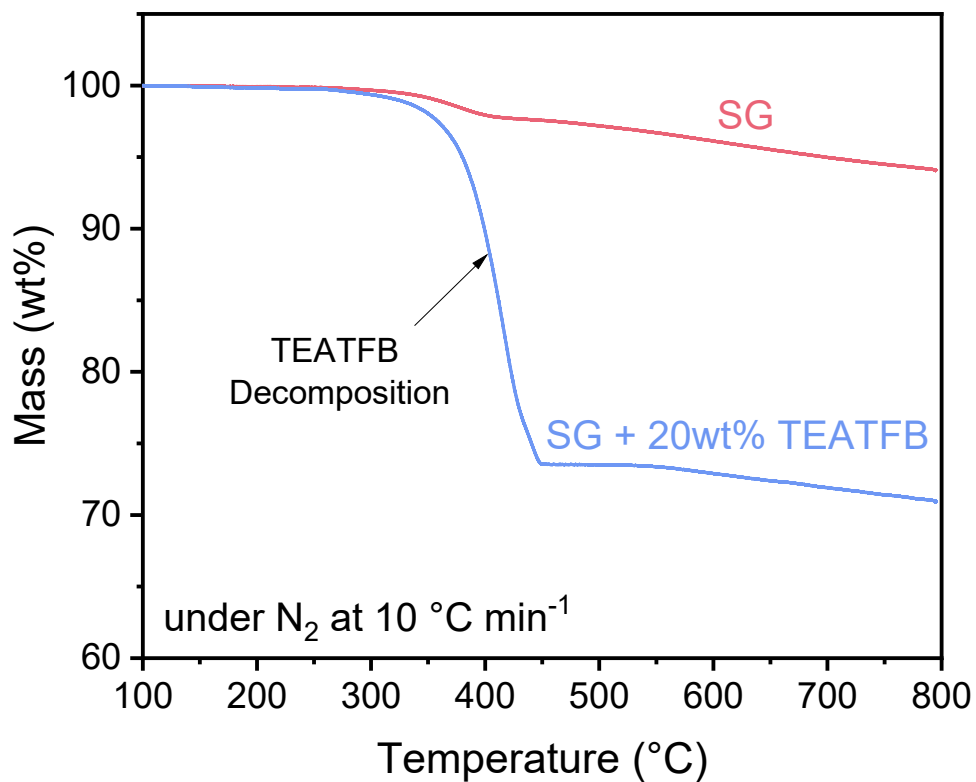

**Fig. S12** TGA curves of SG and SG + 20 wt% TEATFB under N<sub>2</sub>.

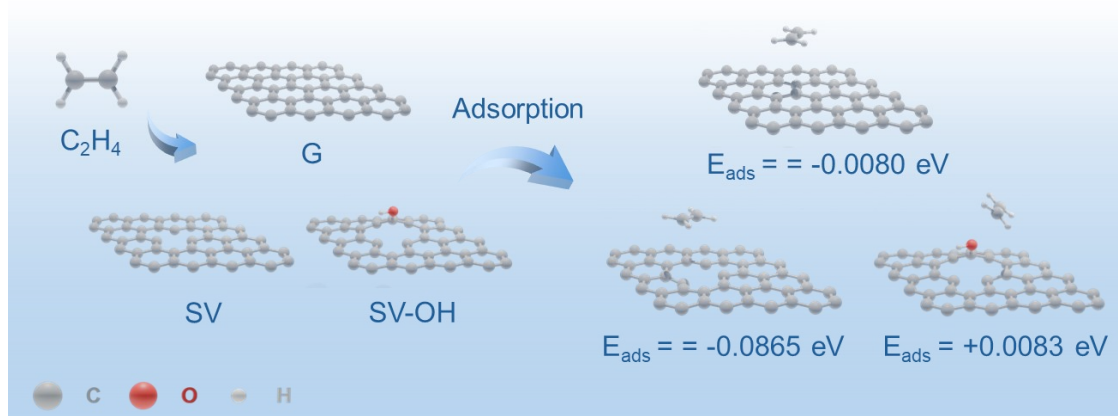

**Fig. S13** Comparison of adsorption energies of  $C_2H_4$  on pristine graphene (G), single-vacancy defective graphene (SV), and OH-passivated single-vacancy graphene (SV-OH).

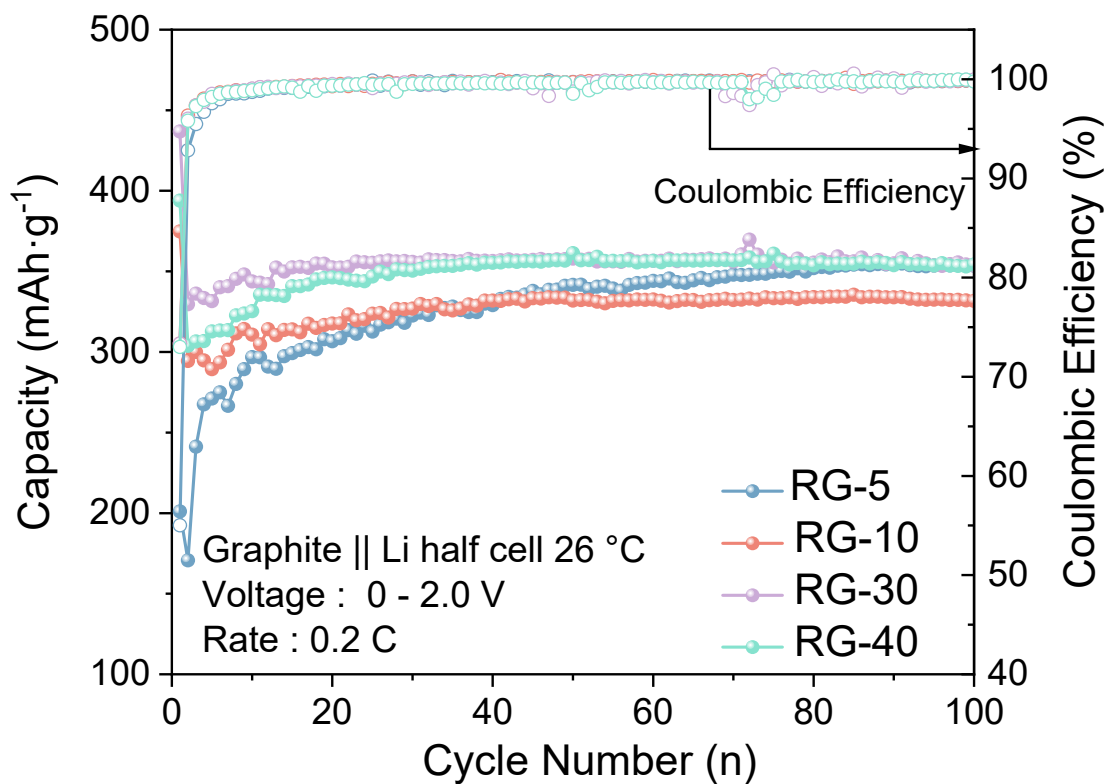

**Fig. S14** Cycling performance of other samples at 0.2 C.

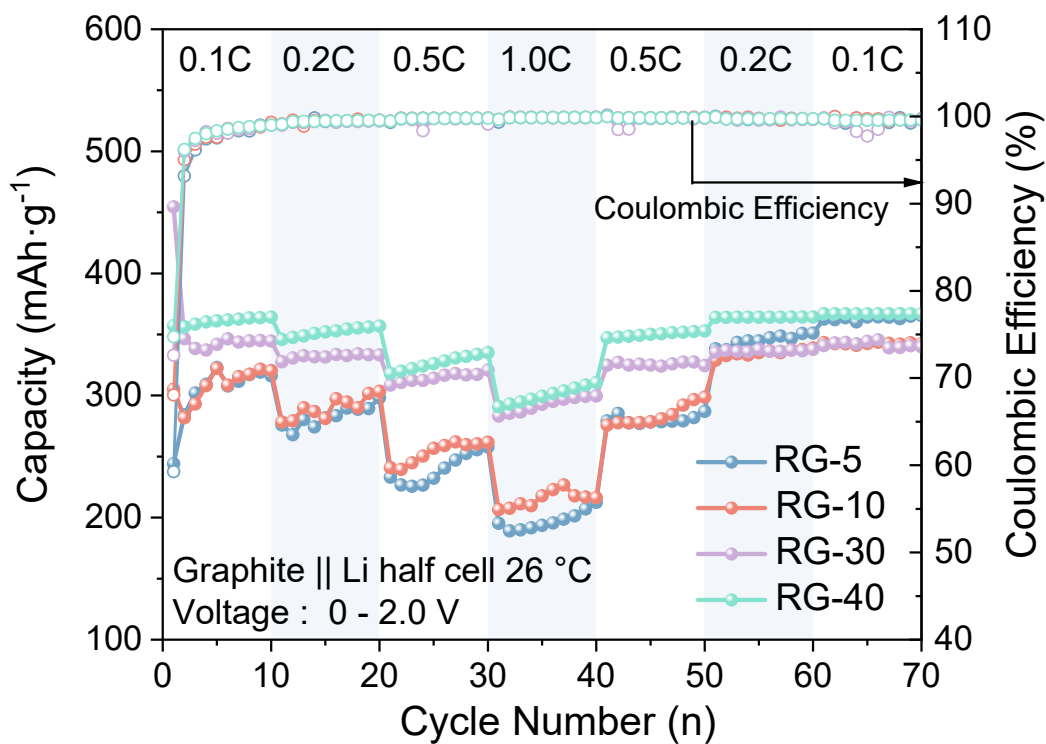

**Fig. S15** Electrochemical rate performance of different samples.

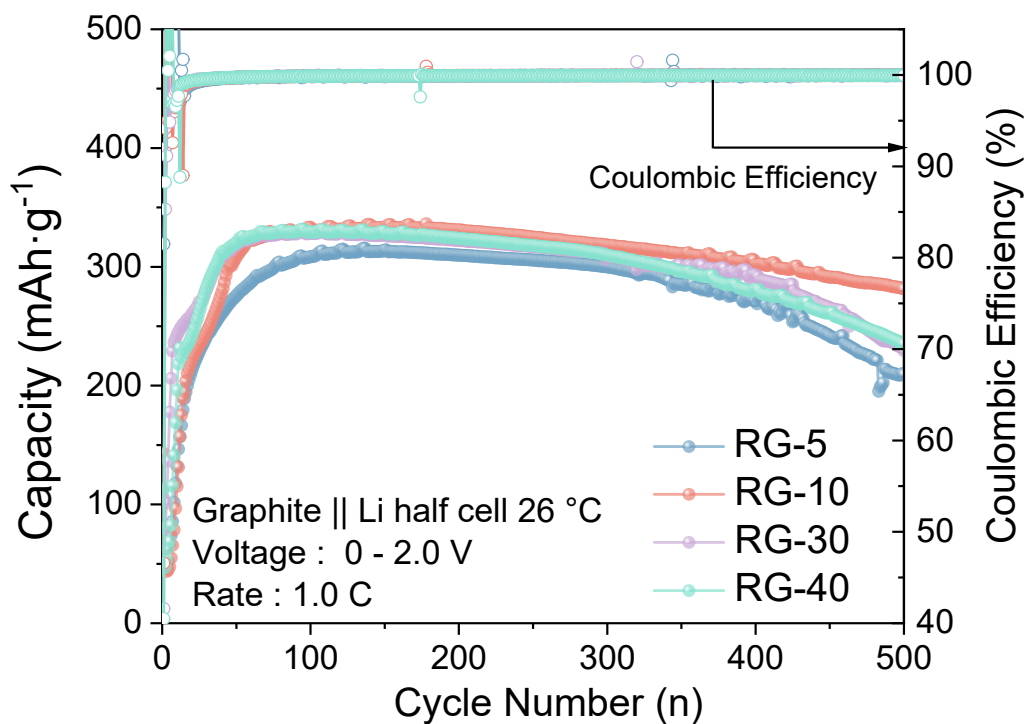

**Fig. S16** Cycling performance of other samples at 1.0 C.

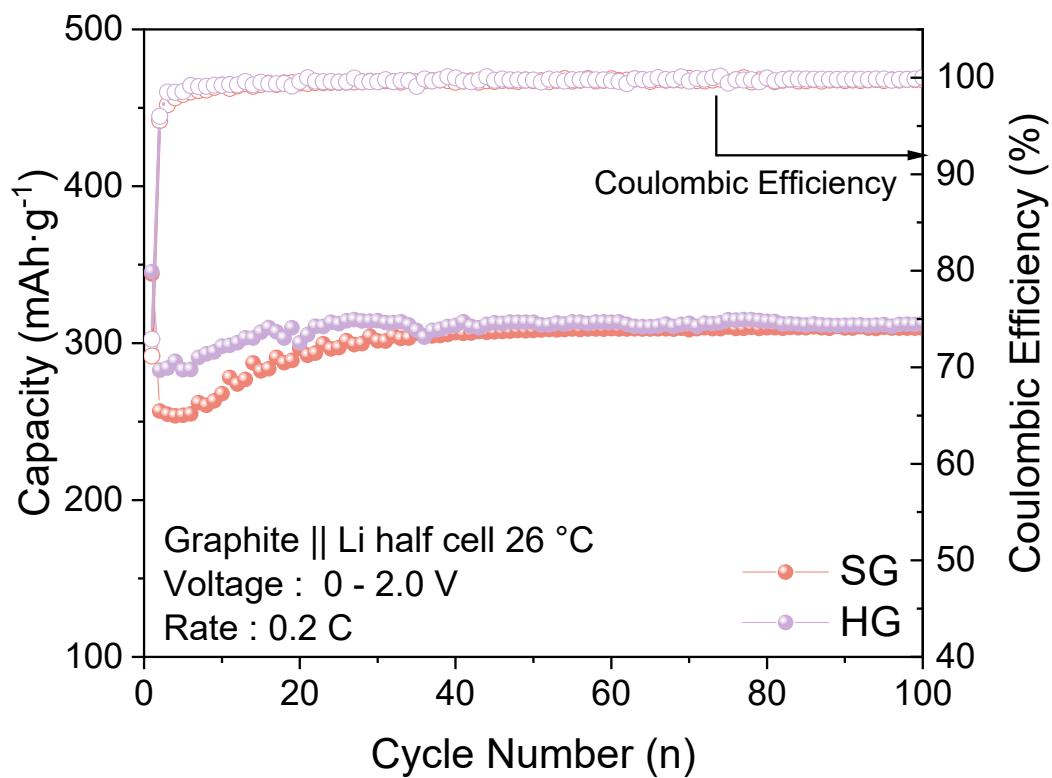

Fig. S17 Cycling performance of HG and SG at 0.2 C.

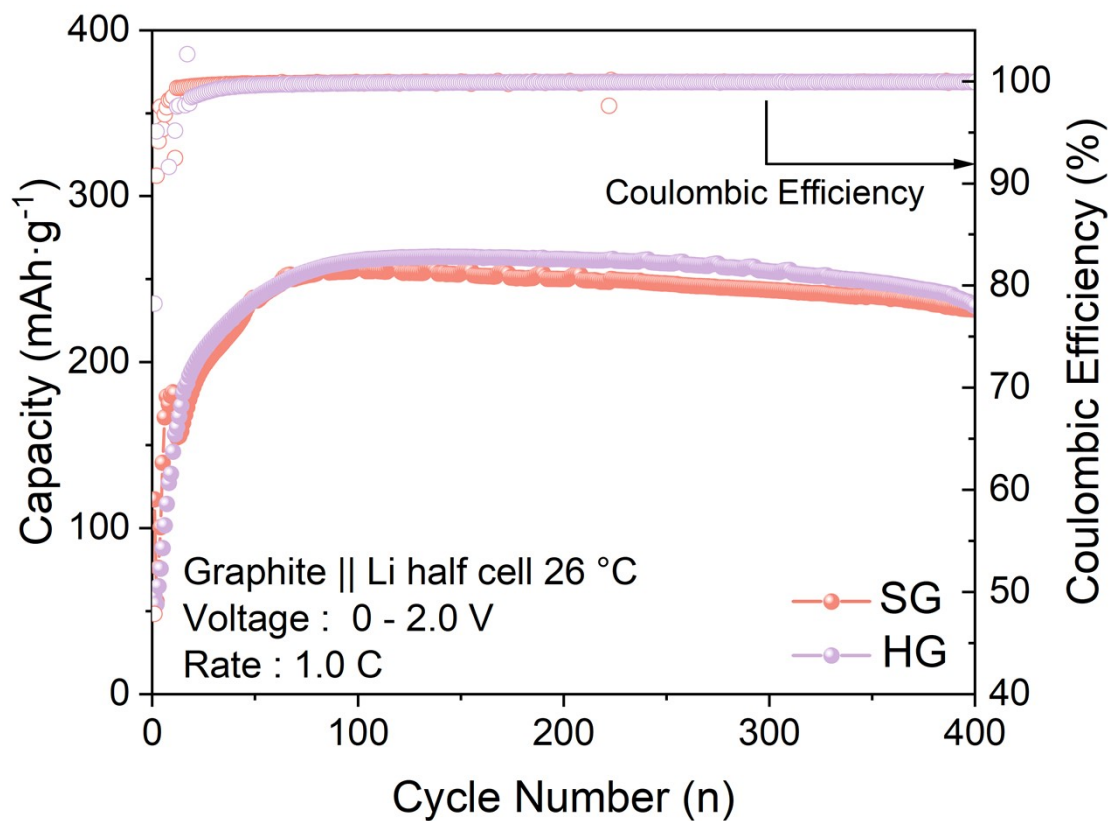

Fig. S18 Cycling performance of HG and SG at 1.0 C.

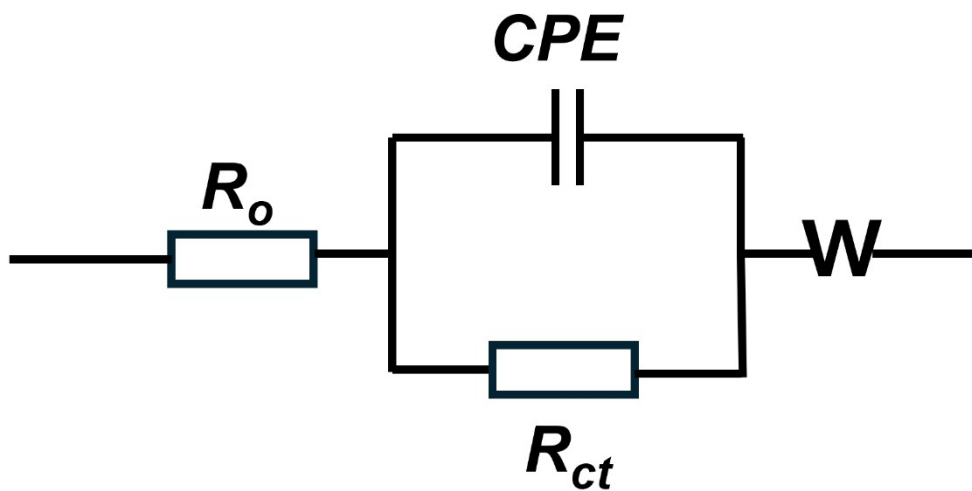

**Fig. S19** Equivalent circuit model used for EIS fitting.

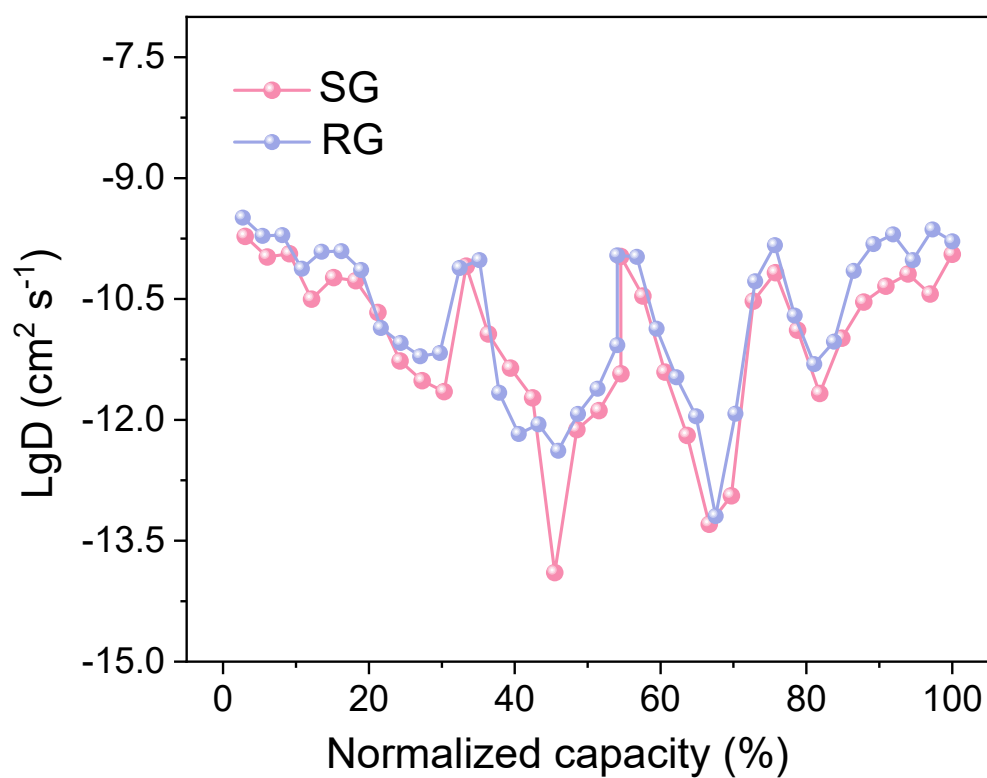

**Fig. S20** Li<sup>+</sup> diffusion coefficients of SG and RG from GITT.

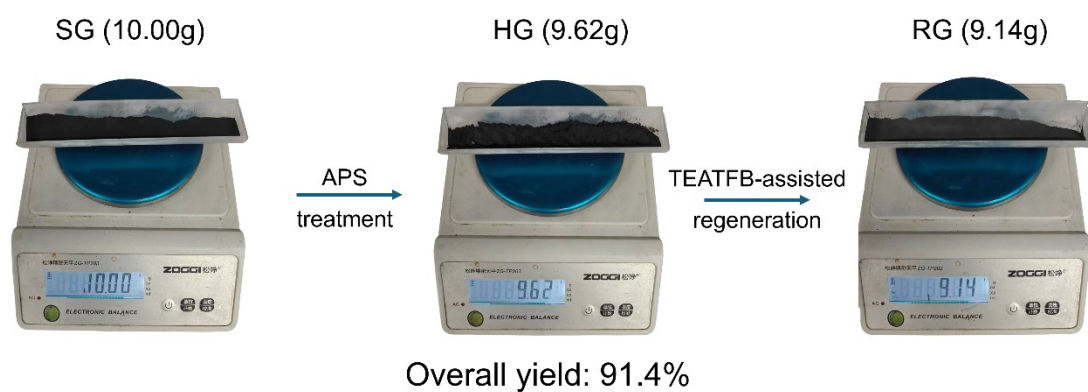

**Fig. S21** The mass change and yield of graphite during the regeneration process.

**Supporting Tables:****Table S1** XRD parameters of each sample on the (002) plane

| Sample     | $2\theta(^{\circ})$ | $d(\text{\AA})$ | Peak Height |
|------------|---------------------|-----------------|-------------|
| SG         | 26.478              | 3.3635          | 43747       |
| CG         | 26.483              | 3.3629          | 49993       |
| RG-5       | 26.555              | 3.3539          | 56510       |
| RG-10      | 26.595              | 3.3489          | 75329       |
| RG-20 (RG) | 26.538              | 3.3561          | 70586       |
| RG-30      | 26.596              | 3.3489          | 59491       |
| RG-40      | 26.537              | 3.3562          | 58753       |

**Table S2** ICP analysis of elemental impurities in SG, HG, and RG samples.

| Sample | Cu   | Co   | Fe    | Li     | Mn   | Ni   | P      |
|--------|------|------|-------|--------|------|------|--------|
| SG     | 5.67 | <LOD | 26.33 | 128.33 | 0.33 | 1.00 | 487.67 |
| HG     | <LOD | <LOD | 3.00  | 30.00  | <LOD | 0.33 | 114.67 |
| RG     | <LOD | <LOD | 0.33  | 7.00   | <LOD | <LOD | 25.00  |

**Table S3** Thermodynamic parameters for Reaction 1 ( $\text{TEATFB} \rightarrow \text{BF}_3 + \text{C}_2\text{H}_5\text{F} + \text{NEt}_3$ ).

| T / K | $\Delta H_1 / \text{kJ}\cdot\text{mol}^{-1}$ | $\Delta G_1 / \text{kJ}\cdot\text{mol}^{-1}$ |
|-------|----------------------------------------------|----------------------------------------------|
| 298   | 138.0                                        | 33.3                                         |
| 673   | 127.5                                        | -93.9                                        |
| 1073  | 115.2                                        | -222.3                                       |

**Table S4** Thermodynamic parameters for Reaction 2 ( $\text{C}_2\text{H}_5\text{F} \rightarrow \text{HF} + \text{C}_2\text{H}_4$ ).

| T / K | $\Delta\text{H}_2$ / $\text{kJ}\cdot\text{mol}^{-1}$ | $\Delta\text{G}_2$ / $\text{kJ}\cdot\text{mol}^{-1}$ |
|-------|------------------------------------------------------|------------------------------------------------------|
| 298   | 67.1                                                 | 28.7                                                 |
| 673   | 69.5                                                 | -21.2                                                |
| 1073  | 67.6                                                 | -74.7                                                |

**Table S5** EIS fitting parameters of fresh SG, CG, and RG cells.

| Parameter | SG    | CG    | RG    |
|-----------|-------|-------|-------|
| $R_s$     | 1.748 | 2.25  | 1.502 |
| $R_{ct}$  | 72.92 | 67.78 | 62.41 |

**Table S6** EIS fitting parameters of fresh SG, CG, and RG cells.

| Sample | Parameter | Fresh | 5th   | 50th  | 100th |
|--------|-----------|-------|-------|-------|-------|
| SG     | $R_s$     | 1.748 | 2.219 | 3.278 | 2.029 |
|        | $R_{ct}$  | 72.92 | 58.18 | 34.13 | 30.64 |
| RG     | $R_s$     | 1.502 | 1.947 | 2.483 | 1.709 |
|        | $R_{ct}$  | 62.41 | 46.16 | 35.99 | 28.78 |

## Details of economic and environment analysis

**Table S7** The cost analysis of hydrometallurgical recycling.

|                | Dosage | Unit | Unit price |        | Cost (\$) | Data source |
|----------------|--------|------|------------|--------|-----------|-------------|
| Spent graphite | 1.25   | kg   | 0.2        | \$/kg  | 0.25      | MS          |
| Energy         | 48.8   | MJ   | 0.03       | \$/MJ  | 1.464     | BD          |
| Water          | 3.1    | gal  | 0.0025     | \$/gal | 0.008     | BD          |
| Ar             | 3.5    | L    | 18         | \$/40L | 1.575     | B2B         |
| Total (\$/kg)  |        |      |            |        | 3.297     |             |

**Notes:** The first heating is a calcination/smelting step at ~1773 K for 4 h under Ar. The second heating is used for carbonization and graphitization at ~2773 K for 4 h; electricity demand is ~39.0 MJ·kg<sup>-1</sup> feed (≈10.83 kWh·kg<sup>-1</sup> feed). Process water is ~2.5 gal·kg<sup>-1</sup> feed for off-gas/dust scrubbing.

**MS:** <https://www.mysteel.net/>. **B2B:** <https://b2b.baidu.com/>.

**BD:** <https://www.baidu.com/>. **SMM:** <https://www.smm.cn/>.

**Table S8** The cost analysis of synthetic graphite

|               | Dosage | Unit | Unit price |        | Cost (\$) | Data source |
|---------------|--------|------|------------|--------|-----------|-------------|
| Needle coke   | 0.9    | kg   | 0.7        | \$/kg  | 0.63      | SMM         |
| Tar pitch     | 0.2    | kg   | 0.35       | \$/kg  | 0.07      | SMM         |
| Energy        | 69.6   | MJ   | 0.03       | \$/MJ  | 2.088     | BD          |
| Water         | 2.8    | gal  | 0.0025     | \$/gal | 0.010     | BD          |
| Ar            | 3.1    | L    | 18         | \$/40L | 1.395     | B2B         |
| Total (\$/kg) |        |      |            |        | 4.193     |             |

**Notes:** Artificial graphite is produced from petroleum or needle coke and coal tar pitch via mixing and granulation, baking at 900 °C, coking at 1300 °C, and graphitization at 2800 °C under argon. Argon consumption is 0.005 kg·kg<sup>-1</sup> feed. Electricity demand is 63.1 MJ·kg<sup>-1</sup> feed. Process water is 2.5 gal·kg<sup>-1</sup> feed. The product yield is 0.907 kg of artificial graphite per kg of feed.

**Table S9** The cost analysis of regenerated graphite

|                | Dosage | Unit | Unit price |        | Cost (\$) | Data source |
|----------------|--------|------|------------|--------|-----------|-------------|
| Spent graphite | 1.12   | kg   | 0.2        | \$/kg  | 0.224     | SMM         |
| Energy         | 10.1   | MJ   | 0.03       | \$/MJ  | 0.303     | BD          |
| Water          | 0.74   | gal  | 0.0025     | \$/gal | 0.002     | BD          |
| APS            | 0.26   | kg   | 0.42       | \$/kg  | 0.109     | B2B         |
| TEATFB         | 0.21   | kg   | 1.39       | \$/kg  | 0.292     | B2B         |
| Ar             | 1.9    | L    | 18         | \$/40L | 0.855     | B2B         |
| Total (\$/kg)  |        |      |            |        | 1.785     |             |

**Notes:** Recycled graphite production process. A mild pre-oxidation is conducted by soaking in 0.5 M ammonium persulfate at a liquid-to-solid ratio of 2.0 L·kg<sup>-1</sup> followed by a 0.5 L·kg<sup>-1</sup> rinse. The powder is then mixed with tetraethylammonium tetrafluoroborate at 20 wt% relative to graphite and heat-treated at 800 °C for 2 h under argon. Argon consumption is 0.003 kg·kg<sup>-1</sup> feed. Electricity demand is 9.0 MJ·kg<sup>-1</sup> feed. Process water is 0.66 gal·kg<sup>-1</sup> feed.

**Reference:**

- 1 C. R. C. Rêgo, L. N. Oliveira, P. Tereshchuk and J. L. F. Da Silva, *J. Phys. Condens. Matter*, 2015, **27**, 415502.
- 2 I. Rey, C. Vallejo, G. Santiago, M. Iturrondobeitia and E. Lizundia, *ACS Sustain. Chem. Eng.*, 2021, **9**, 14488–14501.
- 3 W. Chen, H. Qu, R. Shi, J. Wang, H. Ji, Z. Zhuang, J. Ma, D. Tang, J. Li, J. Tang, G. Ji, X. Xiao, Y. Zhu and G. Zhou, *ACS Energy Lett.*, 2024, **9**, 3505–3515.
- 4 S. Luo, F. Liu, W. Tianxu, Y. Liu, C. Zhang, C. Bie, M. Liu, P. K. Chu, K. Huo and B. Gao, *Energy Storage Mater.*, 2024, **73**, 103833.
- 5 Q. He, C. Guo, K. Han, F. Liu, Y. Feng, X. Wang, X. Qian and J. Meng, *Carbon*, 2025, **244**, 120727.
